# Supplementary material for: Disruption of thalamic functional connectivity is a neural correlate of dexmedetomidine-induced unconsciousness
Source: eLife journal article supplement (doi:10.7554/elife.04499), 2014-11-28
Supplement: supp [file elife_poa_e04499_Figure_2_figure_supplement_1.pdf › elife_poa_e04499_Figure_2_figure_supplement_1.pdf]

A. **Dex-induced unconsciousness vs. Baseline (SUV)**

Z stat  
-2.3 -2.7

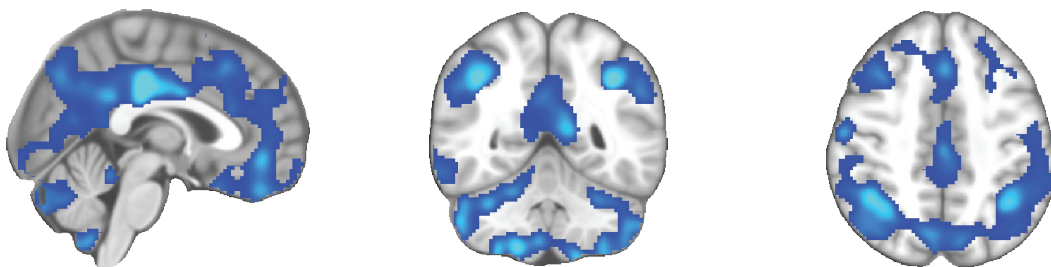

CMRglc

B. **Baseline**

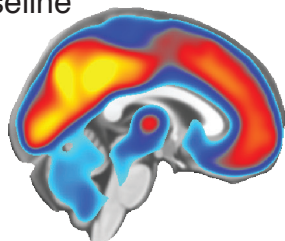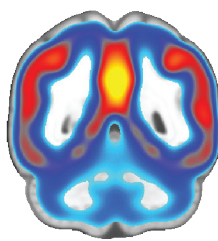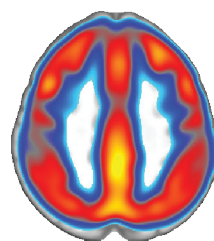

Dexmedetomidine-induced unconsciousness

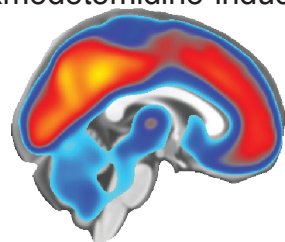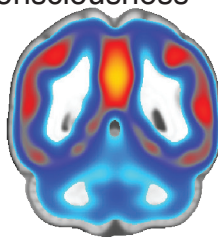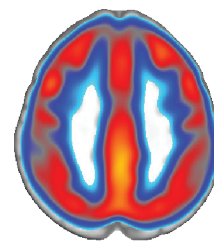

CMRglc  
(mmol/100 g/min)  
35  
18
