# Supplementary figures and images for: Disruption of thalamic functional connectivity is a neural correlate of dexmedetomidine-induced unconsciousness
Source: eLife journal article supplement (doi:10.7554/elife.04499), 2014-11-28

**A. Unconscious vs. Awake  
(CMRglc and rCBF overlap)**

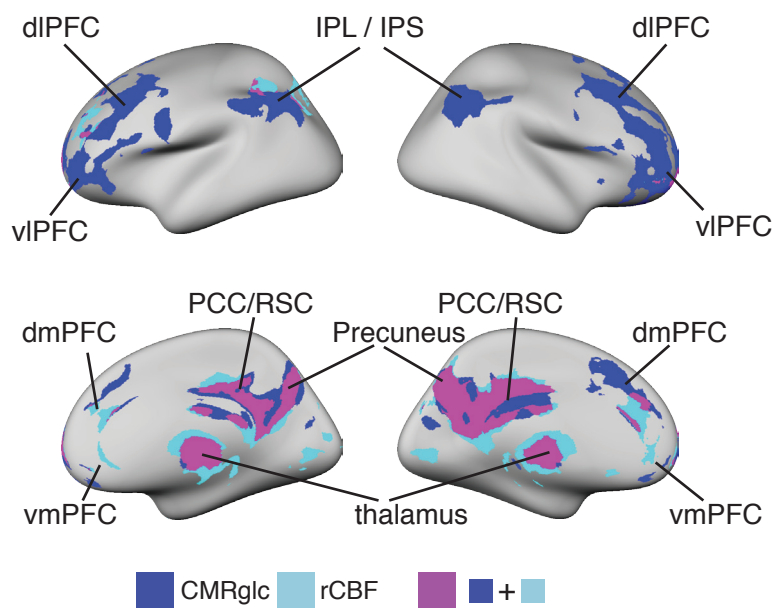

**B.**

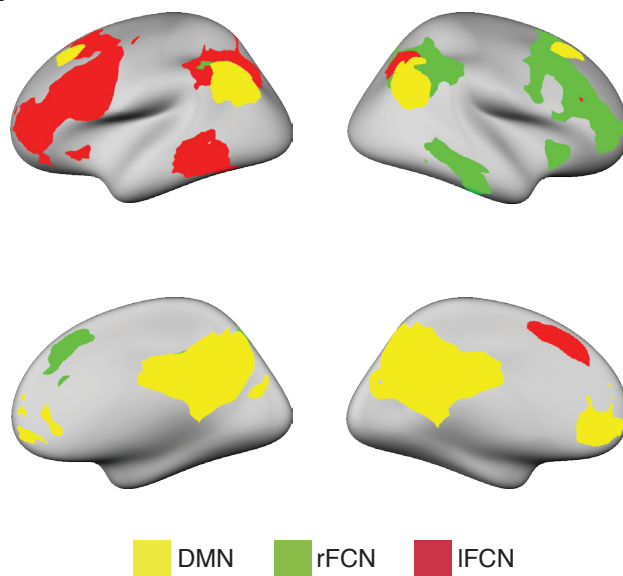

Supplement: supp [file elife_poa_e04499_Figure_3_figure_supplement_1.pdf › elife_poa_e04499_Figure_3_figure_supplement_1.pdf]

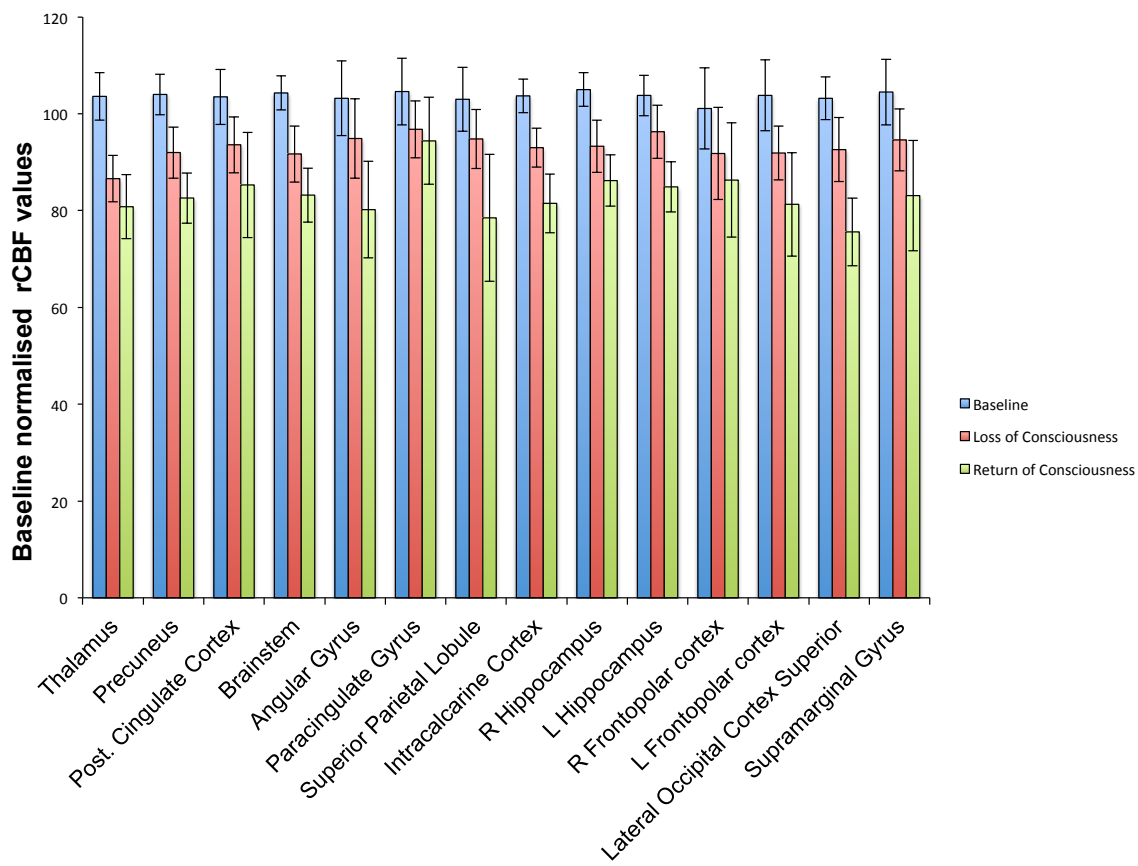

Supplement: supp [file elife_poa_e04499_Figure_5_figure_supplement_1.pdf › elife_poa_e04499_Figure_5_figure_supplement_1.pdf]
